# Supplementary material
Source: MDPI journal article supplement (https://www.mdpi.com/2073-4344/12/8/906)
Supplement: s1 [file s1]

# Modified Mn/ZSM-5 for Non-thermal Plasma Mineralization of VOCs and DFT Simulation Using a Novel Y-type ZSM-5 Model

Su Liu <sup>1</sup>, Jiabin Zhou <sup>1,\*</sup>, Dan Liu <sup>1</sup> and Ke Du <sup>2</sup><sup>1</sup> School of Chemistry and Chemical Engineering, Southwest Petroleum University, Chengdu 610500, China<sup>2</sup> Department of Mechanical and Manufacturing Engineering, University of Calgary, Calgary, Alberta, T2N 1N4, Canada

\* Correspondence: jbzhou@swpu.edu.cn (J.Z.)

## Table of Contents

### 1. Catalysts characterization

### 2. Gas detection conditions

### 3. Computational details

### 4. Supplementary Table S1-S2

**Table S1.** The size parameters of the DDBD reactor.**Table S2.** Correspondence between diffraction angles and related facets.

### 5. Supplementary Figure S1-S2

**Figure S1.** Survey photoemission features from XPS results of samples (a) Mn/ZSM-5 and (b) Mn/ZSM-5-D.**Figure S2.** Cu 2p photoemission features from XPS results of Mn/ZSM-5-D.

**Citation:** Liu, S.; Zhou, J.; Liu, D.; Du, K. Modified Mn/ZSM-5 for Non-thermal Plasma Mineralization of VOCs and DFT Simulation Using a Novel Y-type ZSM-5 Model. *Catalysts* **2022**, *12*, 906.

<https://doi.org/10.3390/catal12080906>

Academic Editor: Wenfeng Shanguan

Received: 27 July 2022

Accepted: 15 August 2022

Published: 17 August 2022

**Publisher's Note:** MDPI stays neutral with regard to jurisdictional claims in published maps and institutional affiliations.

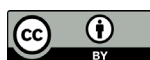

**Copyright:** © 2022 by the authors. Licensee MDPI, Basel, Switzerland. This article is an open access article distributed under the terms and conditions of the Creative Commons Attribution (CC BY) license (<https://creativecommons.org/licenses/by/4.0/>).

## 1. Catalysts Characterization

### 1.1. Details of X-ray Diffraction Tests

The X-ray diffraction (XRD) experiments were performed on diffractometer equipment (Bruker, D8 Advance, Germany) in the  $2\theta$  range of 5–90 °C with Ni-filtered Cu K Alpha radiation ( $\lambda = 0.15418$  nm, 40 kV, 40 mA). The XRD phases were identified by comparison with the reference data from Joint Committee on Powder Diffraction Standards (JCPDS) data files.

### 1.2. Details of N<sub>2</sub> Adsorption-desorption Tests

The N<sub>2</sub> adsorption-desorption isotherms were obtained at −196 °C on a surface area analyzer (Micromeritics, ASAP2020, Norcross, GA, USA). The surface area was estimated by the BET method. The pore size distribution, average pore diameter, and total pore volume were calculated by the BJH method. The samples were outgassed at 100 °C in vacuum for 4 h in pretreatment.

### 1.3. Details of Scanning Electron Microscope

The morphologies and structure of the catalysts were recorded by a Scanning electron microscope (SEM, ZEISS MERLIN Compact, Jena, Germany) equipped with an energy-dispersive X-ray spectrometer.

### 1.4. Details of X-ray Photoelectron Spectroscopy Tests

An X-ray photoelectron spectroscopy (XPS) spectrometer (ESCALAB 250XI, Thermo Fisher Scientific, Waltham, MA, USA) equipped with a monochromatic Al K Alpha X-ray source was employed to evaluate the elemental ionic states.

### 1.5. Raman Spectra

Raman spectra were carried out on a confocal laser micro-Raman spectrometer (Oceanoptics, Raman micro IM-52, Shanghai, China) with laser light of 785 nm.

### 1.6. Details of H<sub>2</sub> Temperature Programmed Reduction (H<sub>2</sub>-TPR)

The H<sub>2</sub>-TPR was also performed on the DAS-7000 Chemisorption Analyzer. The sample dosage and pretreatment method were the same as the O<sub>2</sub>-TPD procedure. In the process of sample reduction, 5% H<sub>2</sub>/N<sub>2</sub> mixture gas was introduced to the reactor and the sample was heated to 850 °C at a flow rate of 8 °C/min.

## 2. Gas Detection Conditions

Gas samples from the outlet were analyzed online by a gas chromatograph (SHIMADZU Chromatograph, GC-2014C, Kyoto, Japan) equipped with a flame ionization detector, which was for organic compounds detection with a 30 m Rtx-1701 capillary column. A TCD detector was used for carbon dioxide analysis with a 4 m TDX-01 stainless steel column, and a flame ionization detector was used for measuring toluene concentration. The column temperature is 200 °C, the temperature of the flame ionization detector is 220 °C, and the temperature of the TCD detector is 200 °C.

## 3. Computational Details

All calculations in this work are performed using the CASTEP code, which is based on density functional theory (DFT) calculations with the plane-wave pseudopotential method. Perdew–Burke–Ernzerhof (PBE) functional in the generalized gradient approximation (GGA) is chosen to describe the exchange-correlation potential [1]. The Tkatchenko and Scheffler (TS) scheme is used to correct for the influence of van der Waals (vdW) forces [2]. The plane-wave energy cutoff is set to 480 eV with 1×1×1 Monkhorst-pack k-points grid. The tolerance of self-consistent calculation is set as 5.0×10<sup>−5</sup> eV/atom. The maximum displacement below 0.05 Å and maximum force on atoms below 0.5 eV/Å are set as the convergence thresholds in geometry optimization.

#### 4. Supplementary Table S1–S2

**Table S1.** The size parameters of the DDBD reactor.

|                            | Length (mm) | Outer Diameter (mm) | Inner Diameter (mm) |
|----------------------------|-------------|---------------------|---------------------|
| exterior dielectric        | 300         | 25                  | 20                  |
| interior dielectric        | 300         | 12                  | 7.5                 |
| high voltage electrode     | 150         | —                   | —                   |
| grounded voltage electrode | 300         | —                   | —                   |

The cylindrical DDBD reactor contains two layers of crystalline silica dielectric (both 300 mm in length): the exterior one (outer diameter of 25 mm and inner diameter of 20 mm) and interior one (outer diameter of 12 mm and inner diameter of 7.5 mm), resulting in an effective discharge gap of 4 mm. The length of the high-voltage electrode outside the exterior dielectric is 150 mm, while the grounded electrode inside the interior dielectric has a length of 300 mm, resulting in a 150 mm effective discharge length.

**Table S2.** Correspondence between diffraction angles and related facets.

| Diffraction angle | Related Facet |
|-------------------|---------------|
| 7.9°              | {101}         |
| 8.9°              | {020}         |
| 13.9°             | {102}         |
| 15.5°             | {131}         |
| 15.9°             | {202}         |
| 19.3°             | {312}         |
| 20.4°             | {103}         |
| 20.9°             | {421}         |
| 23.2°             | {501}         |
| 23.9°             | {303}         |
| 24.5°             | {133}         |
| 25.9°             | {432}         |
| 29.8°             | {630}         |
| 45.0°             | {804}         |

#### 5. Supplementary Figure S1–S2

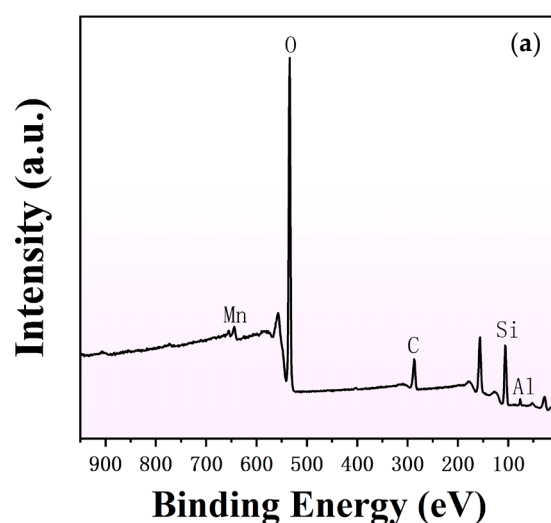

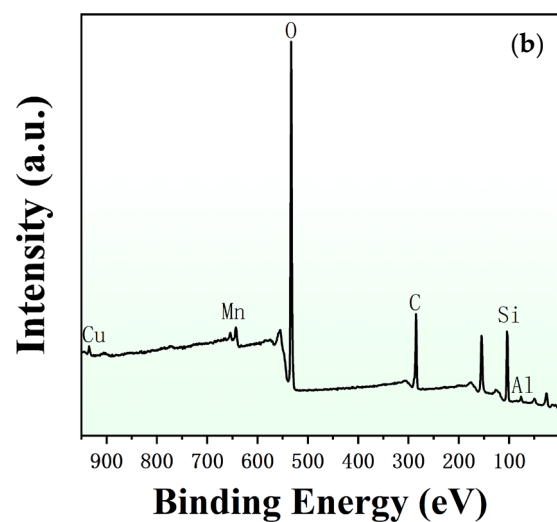

**Figure S1.** Survey photoemission features from XPS results of samples: (a) Mn/ZSM-5 and (b) Mn/ZSM-5-D

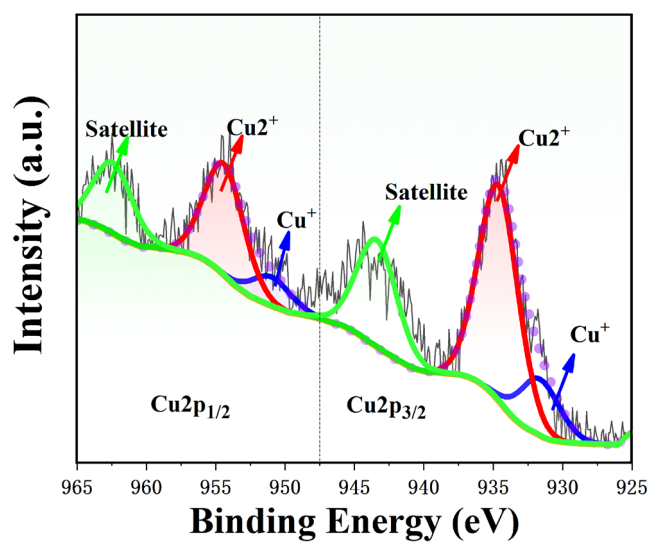

**Figure S2.** Cu 2p photoemission features from XPS results of Mn/ZSM-5-D.

## References

1. Perdew, J.P.; Burke, K.; Ernzerhof, M. Generalized Gradient Approximation Made Simple. *Phys. Rev. Lett.* **1997**, *77*, 3865–3868.
2. Tkatchenko, A.; Scheffler, M. Accurate Molecular Van Der Waals Interactions from Ground-State Electron Density and Free-Atom Reference Data. *Phys. Rev. Lett.* **2009**, *102*, 69–72.
